# Supplementary material for: Measurements of frazil ice flocs in rivers
Source: Copernicus journal article supplement (doi:10.5194/tc-18-4177-2024), 2024-09-18
Supplement: Supplementary file 1 [file tc-18-4177-2024-supplement.pdf]

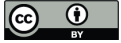

*Supplement of*

## **Measurements of frazil ice flocs in rivers**

**Chuankang Pei et al.**

*Correspondence to:* Mark Loewen ([mrloewen@ualberta.ca](mailto:mrloewen@ualberta.ca))

The copyright of individual parts of the supplement might differ from the article licence.

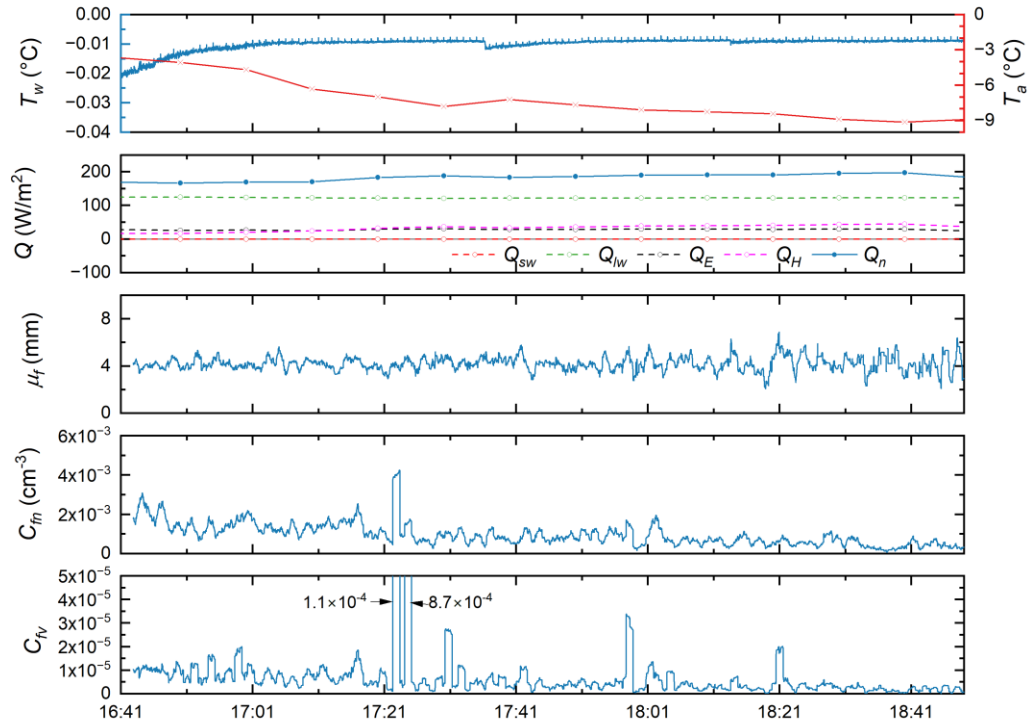

**Figure S1.** Time series of (a) water and air temperatures  $T_w$  and  $T_a$ , (b) heat flux  $Q$ , (c) floc mean size  $\mu_f$ , (d) floc number concentration  $C_{fn}$  and (e) floc volumetric concentration  $C_{fv}$  for deployment NSR-L1 on December 3, 2021.

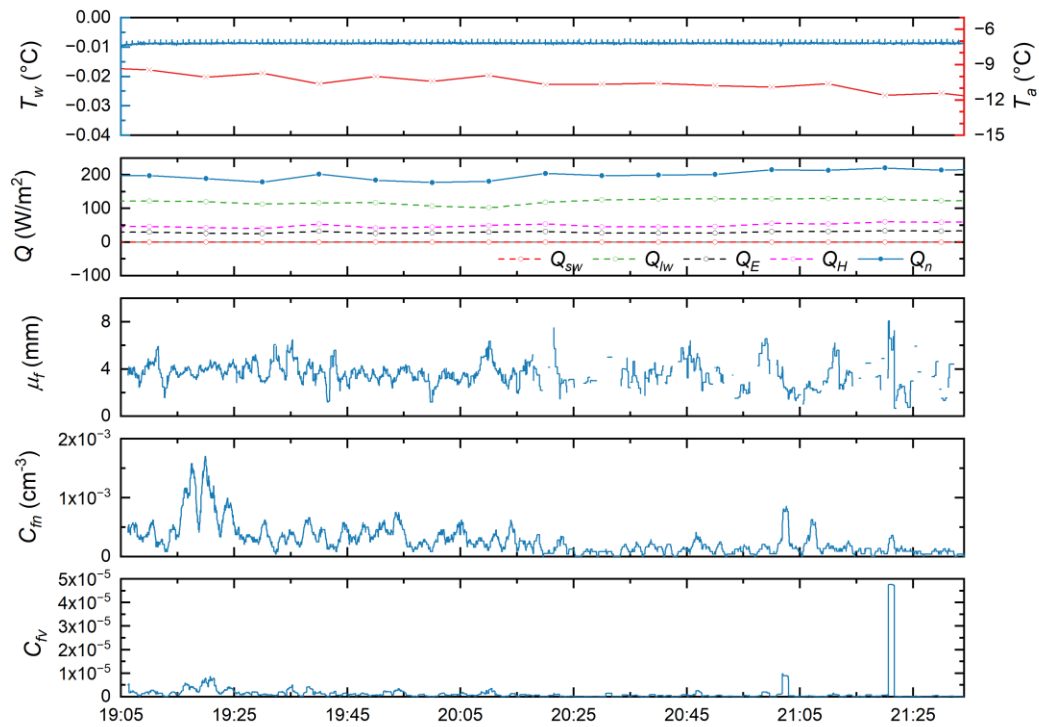

**Figure S2.** Time series of (a) water and air temperatures  $T_w$  and  $T_a$ , (b) heat flux  $Q$ , (c) floc mean size  $\mu_f$ , (d) floc number concentration  $C_{fn}$  and (e) floc volumetric concentration  $C_{fv}$  for deployment NSR-L2 on December 3, 2021.

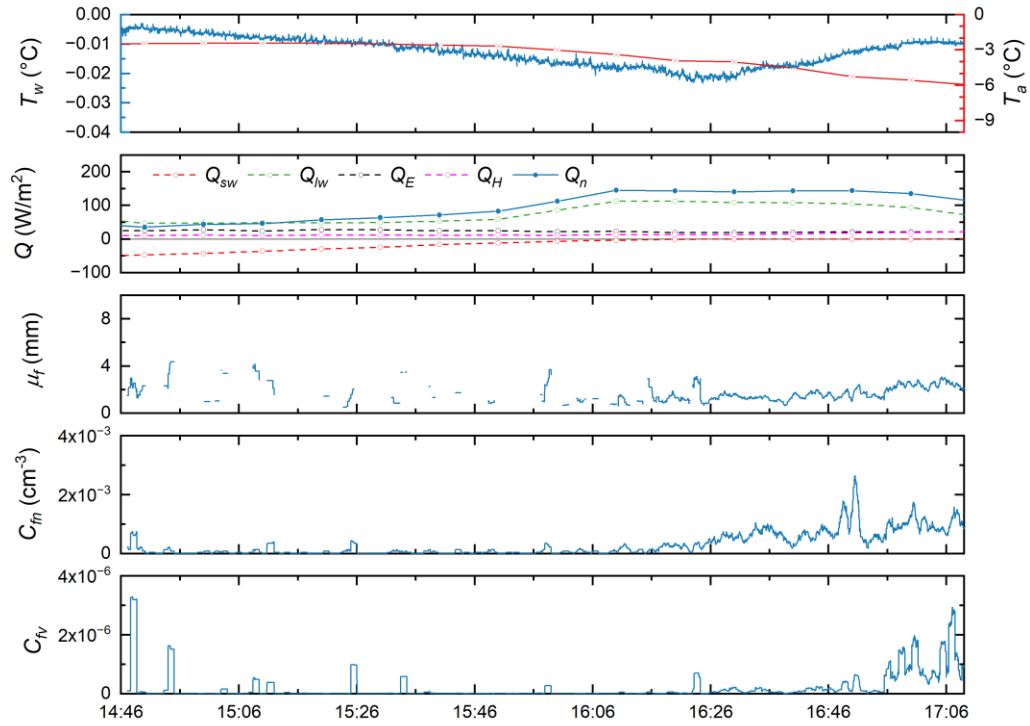

Figure S3. Time series of (a) water and air temperatures  $T_w$  and  $T_a$ , (b) heat flux  $Q$ , (c) flocculation mean size  $\mu_f$ , (d) flocculation number concentration  $C_{fn}$  and (e) flocculation volumetric concentration  $C_{fv}$  for deployment NSR-L3 on December 9, 2021.

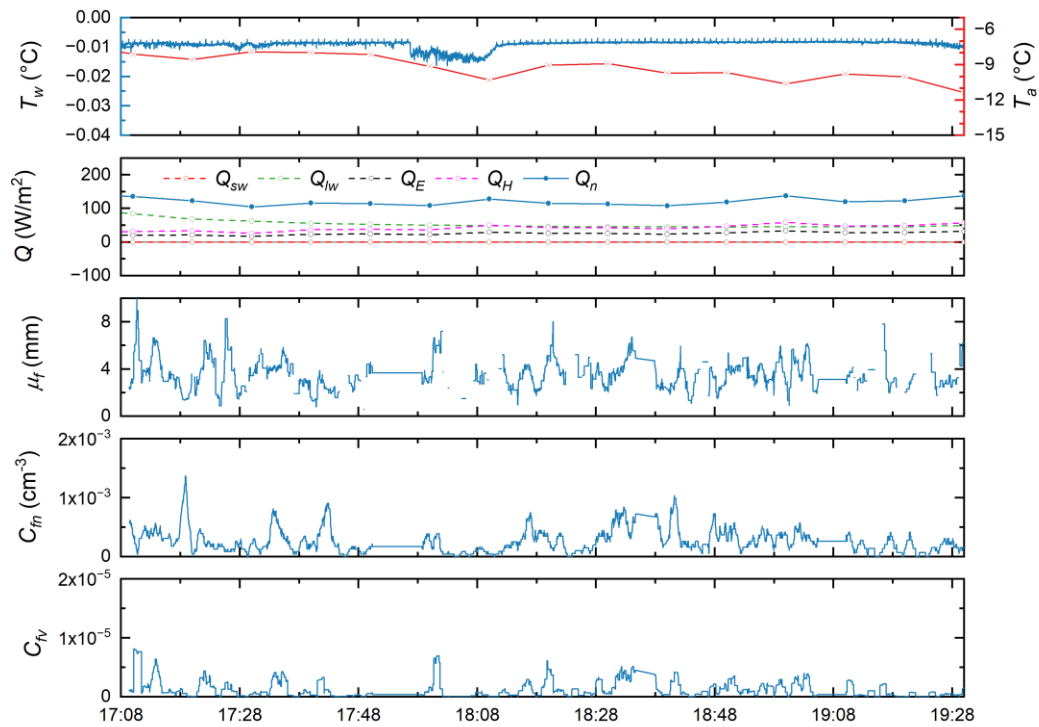

Figure S4. Time series of (a) water and air temperatures  $T_w$  and  $T_a$ , (b) heat flux  $Q$ , (c) flocculation mean size  $\mu_f$ , (d) flocculation number concentration  $C_{fn}$  and (e) flocculation volumetric concentration  $C_{fv}$  for deployment NSR-L5 on December 12, 2021.

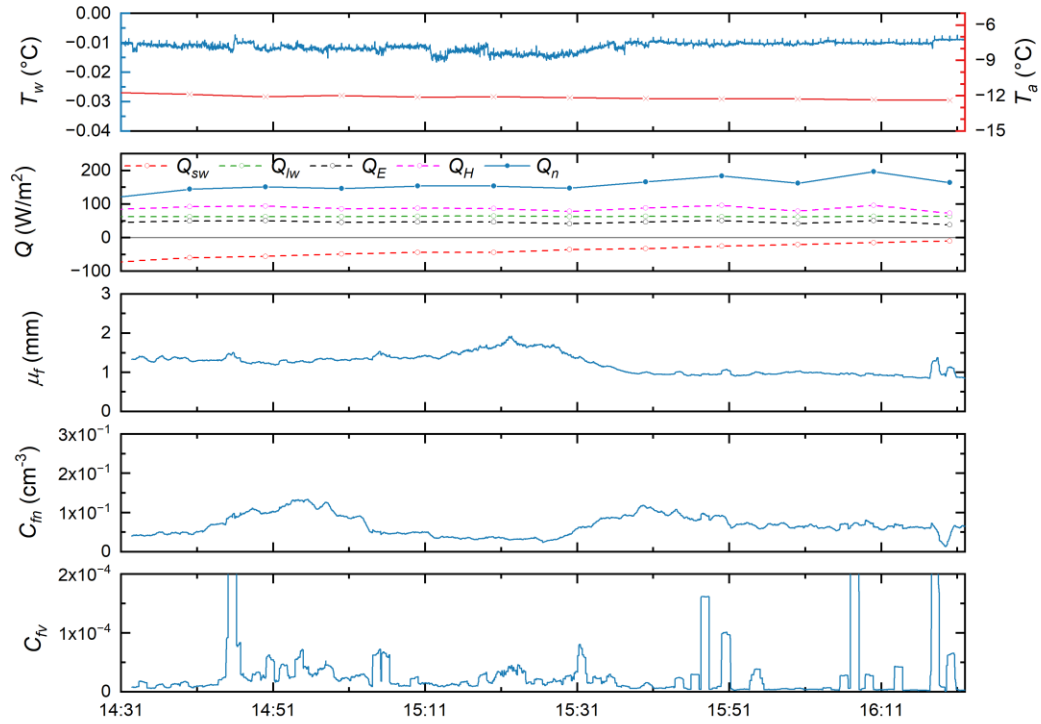

Figure S5. Time series of (a) water and air temperatures  $T_w$  and  $T_a$ , (b) heat flux  $Q$ , (c) flocc mean size  $\mu_f$ , (d) flocc number concentration  $C_{fn}$  and (e) flocc volumetric concentration  $C_{fv}$  for deployment NSR-L6 on November 7, 2022.

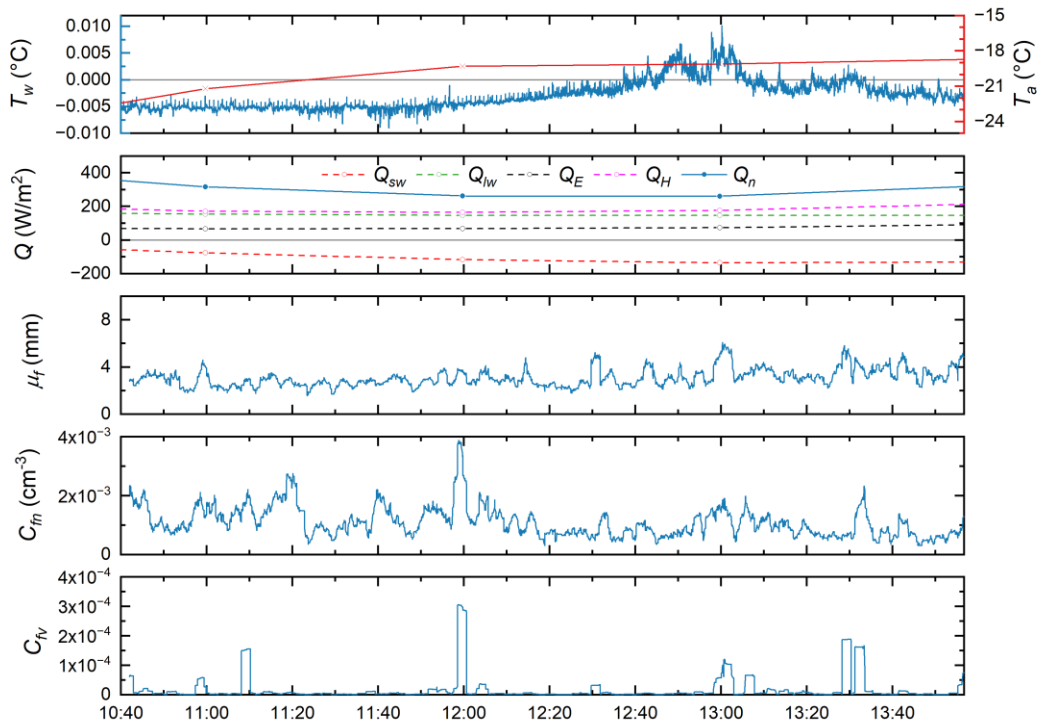

Figure S6. Time series of (a) water and air temperatures  $T_w$  and  $T_a$ , (b) heat flux  $Q$ , (c) flocc mean size  $\mu_f$ , (d) flocc number concentration  $C_{fn}$  and (e) flocc volumetric concentration  $C_{fv}$  for deployment PR-F1 on December 12, 2022.

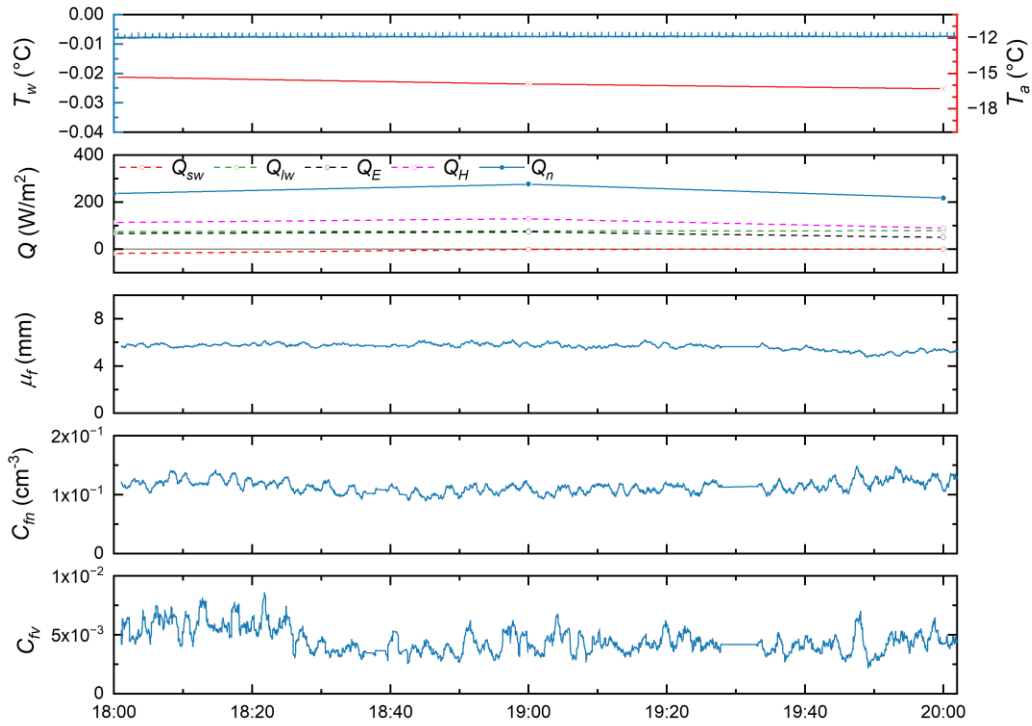

Figure S7. Time series of (a) water and air temperatures  $T_w$  and  $T_a$ , (b) heat flux  $Q$ , (c) flocc mean size  $\mu_f$ , (d) flocc number concentration  $C_{fn}$  and (e) flocc volumetric concentration  $C_{fv}$  for deployment KR-E1 on January 29, 2023.

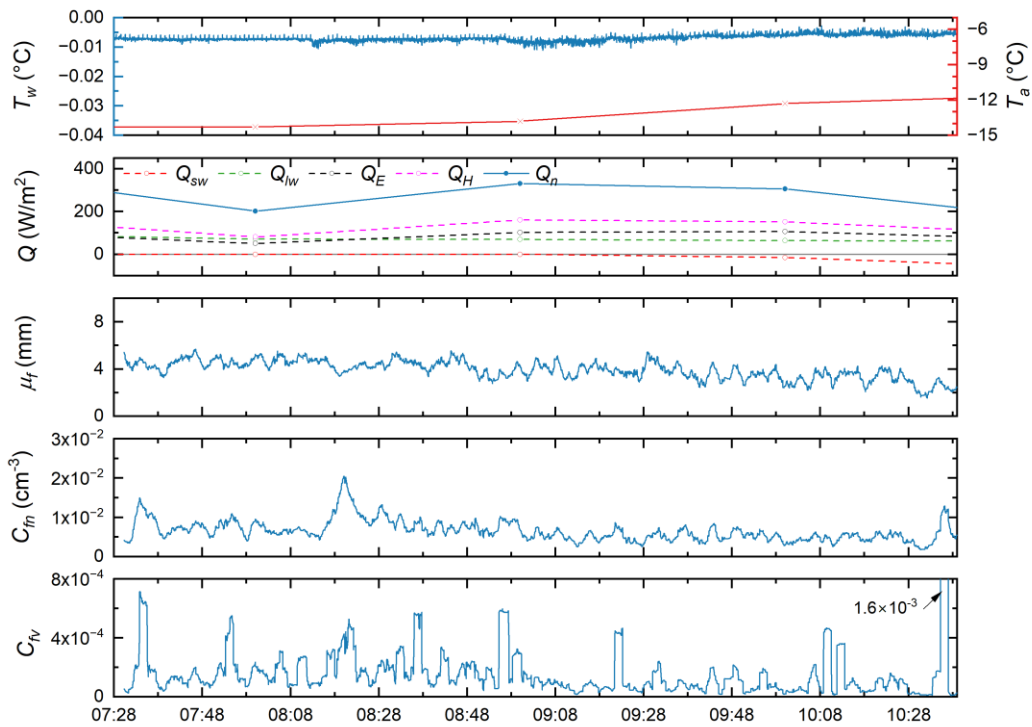

Figure S8. Time series of (a) water and air temperatures  $T_w$  and  $T_a$ , (b) heat flux  $Q$ , (c) flocc mean size  $\mu_f$ , (d) flocc number concentration  $C_{fn}$  and (e) flocc volumetric concentration  $C_{fv}$  for deployment KR-F2 on January 31, 2023.
